# Supplementary material
Source: ML conference proceedings conference paper supplement (https://proceedings.mlr.press/v51/li16b.html)
Supplement: Supplementary file 1 [file li16b-supp.pdf]

## A Proof of Lemma 3

Using the notation  $\hat{\mathbf{v}} = Y_{n-1}\mathbf{v}/\|Y_{n-1}\mathbf{v}\|$  and  $A_n = \mathbf{x}_n\mathbf{x}_n^\top$ , one can follow the analysis in Balsubramani et al. (2013) to show that  $\Phi_n^{(\mathbf{v})} \leq \Phi_{n-1}^{(\mathbf{v})} + \beta_n - Z_n$ , with

- $\beta_n = 5\gamma_n^2 + 2\gamma_n^3$ ,
- $Z_n = 2\gamma_n(\hat{\mathbf{v}}^\top U U^\top A_n \hat{\mathbf{v}} - \|U^\top \hat{\mathbf{v}}\|^2 \hat{\mathbf{v}}^\top A_n \hat{\mathbf{v}})$ , and
- $\mathbb{E}[Z_n | \mathcal{F}_{n-1}] \geq 2\gamma_n(\lambda - \hat{\lambda})\Phi_{n-1}^{(\mathbf{v})}(1 - \Phi_{n-1}^{(\mathbf{v})}) \geq 0$ .

We omit the proof here as the adaptation is straightforward. It remains to show our better bound on  $|Z_n|$ . For this, note that

$$|Z_n| \leq 2\gamma_n \|\hat{\mathbf{v}}^\top U U^\top - \|U^\top \hat{\mathbf{v}}\|^2 \hat{\mathbf{v}}^\top\| \cdot \|A_n \hat{\mathbf{v}}\|,$$

where  $\|A_n \hat{\mathbf{v}}\| \leq 1$  and

$$\begin{aligned} & \|\hat{\mathbf{v}}^\top U U^\top - \|U^\top \hat{\mathbf{v}}\|^2 \hat{\mathbf{v}}^\top\|^2 \\ &= \|U^\top \hat{\mathbf{v}}\|^2 - 2\|U^\top \hat{\mathbf{v}}\|^4 + \|U^\top \hat{\mathbf{v}}\|^4 \\ &= \|U^\top \hat{\mathbf{v}}\|^2 (1 - \|U^\top \hat{\mathbf{v}}\|^2). \end{aligned}$$

As  $\|U^\top \hat{\mathbf{v}}\|^2 \leq 1$  and  $(1 - \|U^\top \hat{\mathbf{v}}\|^2) = \Phi_{n-1}^{(\mathbf{v})}$ , we have

$$|Z_n| \leq 2\gamma_n \sqrt{\Phi_{n-1}^{(\mathbf{v})}}.$$

## B Proof of Lemma 4

Assume that the event  $\Gamma_0$  holds and consider any  $n \in [n_0, n_1]$ . We need the following, which we prove in Appendix B.1.

**Proposition 1.** *For any  $n > m$  and any  $\mathbf{v} \in \mathbb{R}^k$ ,*

$$\frac{\|U^\top Y_n \mathbf{v}\|}{\|Y_n\|} \geq \left(\frac{m}{n}\right)^{3c} \cdot \frac{\|U^\top Y_m \mathbf{v}\|}{\|Y_m\|}.$$

From Proposition 1, we know that for any  $\mathbf{v} \in \mathcal{S}$ ,

$$\frac{\|U^\top Y_n \mathbf{v}\|}{\|Y_n \mathbf{v}\|} \geq \frac{\|U^\top Y_n \mathbf{v}\|}{\|Y_n\|} \geq \left(\frac{n_0}{n}\right)^{3c} \frac{\|U^\top Y_0 \mathbf{v}\|}{\|Y_0\|},$$

where  $(n_0/n)^{3c} \geq (n_0/n_1)^{3c} \geq (1/c_1)^{3c}$  for the constant  $c_1$  given in Remark 1. As  $Y_0 = Q_0$  and  $\|Q_0\| = 1 = \|Q_0 \mathbf{v}\|$ , we obtain

$$\frac{\|U^\top Y_n \mathbf{v}\|}{\|Y_n \mathbf{v}\|} \geq \frac{\|U^\top Q_0 \mathbf{v}\|}{c_1^{3c} \|Q_0 \mathbf{v}\|} \geq \frac{\sqrt{1 - \rho_0}}{c_1^{3c}} = \sqrt{\frac{\bar{c}}{c_1^{6c} k d}}.$$

Therefore, assuming  $\Gamma_0$ , we always have

$$\Phi_n = \max_{\mathbf{v}} \left(1 - \frac{\|U^\top Y_n \mathbf{v}\|^2}{\|Y_n \mathbf{v}\|^2}\right) \leq 1 - \frac{\bar{c}}{c_1^{6c} k d} = \rho_1.$$

## B.1 Proof of Proposition 1

Recall that for any  $n$ ,  $Y_n = Y_{n-1} + \gamma_n \mathbf{x}_n \mathbf{x}_n^\top Y_{n-1}$  and  $\|\mathbf{x}_n \mathbf{x}_n^\top\| \leq 1$ . Then for any  $\mathbf{v} \in \mathbb{R}^k$ ,

$$\frac{\|U^\top Y_n \mathbf{v}\|}{\|Y_n\|} \geq \frac{\|U^\top Y_{n-1} \mathbf{v}\| - \gamma_n \|U^\top Y_{n-1} \mathbf{v}\|}{\|Y_{n-1}\| + \gamma_n \|Y_{n-1}\|},$$

which is

$$\frac{1 - \gamma_n}{1 + \gamma_n} \cdot \frac{\|U^\top Y_{n-1} \mathbf{v}\|}{\|Y_{n-1}\|} \geq e^{-3\gamma_n} \frac{\|U^\top Y_{n-1} \mathbf{v}\|}{\|Y_{n-1}\|},$$

using the fact that  $1 - x \geq e^{-2x}$  for  $x \leq 1/2$  and  $\gamma_n \leq 1/2$ . Then by induction, we have

$$\frac{\|U^\top Y_n \mathbf{v}\|}{\|Y_n\|} \geq e^{-3 \sum_{t>m}^n \gamma_t} \cdot \frac{\|U^\top Y_m \mathbf{v}\|}{\|Y_m\|}.$$

The Proposition follows as

$$e^{-3 \sum_{t>m}^n \gamma_t} = e^{-3c \sum_{t>m}^n \frac{1}{t}} \geq \left(\frac{m}{n}\right)^{3c}$$

using the fact that  $\sum_{t>m}^n \frac{1}{t} \leq \int_m^n \frac{1}{x} dx = \ln\left(\frac{n}{m}\right)$ .

## C Proof of Lemma 5

According to Lemma 3, our  $\Phi_n^{(\mathbf{v})}$ 's satisfy the same recurrence relation as the functions  $\Psi_n$ 's of Balsubramani et al. (2013). We can therefore have the following, which we prove in Appendix C.1.

**Lemma 9.** *Let  $\hat{\rho}_i = \rho_i / \lceil e^{5/c_0} \rceil^{c_0(1-\rho_i)}$ . Then for any  $\mathbf{u} \in \mathcal{S}$  and  $\alpha_i \geq 12c^2/n_{i-1}$ ,*

$$\Pr \left[ \sup_{n \geq n_i} \Phi_n^{(\mathbf{u})} \geq \hat{\rho}_i + \alpha_i \mid \Gamma_i \right] \leq e^{-\Omega((\alpha_i^2/(c^2 \rho_i))n_{i-1})}.$$

Our goal is to bound  $\Pr[-\Gamma_{i+1} | \Gamma_i]$ , which is

$$\Pr \left[ \exists \mathbf{v} \in \mathcal{S} : \sup_{n_i \leq n < n_{i+1}} \Phi_n^{(\mathbf{v})} \geq \rho_{i+1} \mid \Gamma_i \right].$$

As discussed before, we cannot directly apply a union bound on the bound in Lemma 9 as there are infinitely many  $\mathbf{v}$ 's in  $\mathcal{S}$ . Instead, we look for a small “ $\epsilon$ -net”  $\mathcal{D}_i$  of  $\mathcal{S}$ , with the property that any  $\mathbf{v} \in \mathcal{S}$  has some  $\mathbf{u} \in \mathcal{D}_i$  with  $\|\mathbf{v} - \mathbf{u}\| \leq \epsilon$ . Such a  $\mathcal{D}_i$  with  $|\mathcal{D}_i| \leq (1/\epsilon)^{O(k)}$  is known to exist (see e.g. Milman and Schechtman (1986)). Then what we need is that when  $\mathbf{v}$  and  $\mathbf{u}$  are close,  $\Phi_n^{(\mathbf{v})}$  and  $\Phi_n^{(\mathbf{u})}$  are close as well. This is guaranteed by the following, which we prove in Appendix C.2.

**Lemma 10.** *Suppose  $\Gamma_i$  happens. Then for any  $n \in [n_i, n_{i+1}]$ , any  $\epsilon \leq \sqrt{1 - \rho_i}/(2c_1^{6c})$ , and any  $\mathbf{u}, \mathbf{v} \in \mathcal{S}$  with  $\|\mathbf{u} - \mathbf{v}\| \leq \epsilon$ , we have*

$$\left| \Phi_n^{(\mathbf{v})} - \Phi_n^{(\mathbf{u})} \right| \leq 16c_1^{6c} \epsilon / \sqrt{1 - \rho_i}.$$

According to this, we can choose  $\alpha_i = (\rho_{i+1} - \hat{\rho}_i)/2$  and  $\epsilon = \alpha_i \sqrt{1 - \rho_i}/(16c_1^{6c})$  so that with  $\|\mathbf{u} - \mathbf{v}\| \leq \epsilon$ , we have  $|\Phi_n^{(\mathbf{v})} - \Phi_n^{(\mathbf{u})}| \leq \alpha_i$ . This means that given any  $\mathbf{v} \in \mathcal{S}$  with  $\Phi_n^{(\mathbf{v})} \geq \rho_{i+1}$ , there exists some  $\mathbf{u} \in \mathcal{D}_i$  with  $\Phi_n^{(\mathbf{u})} \geq \rho_{i+1} - \alpha_i = \hat{\rho}_i + \alpha_i$ . As a result, we can now apply a union bound over  $\mathcal{D}_i$  and have

$$\Pr[-\Gamma_{i+1} | \Gamma_i] \leq \sum_{\mathbf{u} \in \mathcal{D}_i} \Pr \left[ \sup_{n \geq n_i} \Phi_n^{(\mathbf{u})} \geq \hat{\rho}_i + \alpha_i \mid \Gamma_i \right]. \quad (7)$$

To bound this further, consider the following two cases.

First, for the case of  $i < \pi_1$ , we have  $\rho_i \geq 3/4$  and  $\eta_i = 1 - \rho_i \leq 1/4$ , so that

$$\hat{\rho}_i \leq \rho_i e^{-5(1-\rho_i)} = (1 - \eta_i) e^{-5\eta_i} \leq e^{-6\eta_i} \leq 1 - 3\eta_i.$$

Then  $\alpha_i \geq ((1 - 2\eta_i) - (1 - 3\eta_i))/2 = \eta_i/2$ , which is at least  $12c^2/n_{i-1}$ , as  $\eta_i \geq \eta_1 \geq \bar{c}/(c_1^{6c}kd)$  and  $n_{i-1} \geq n_0 = \hat{c}^c k^3 d^2 \log d$  for a large enough constant  $\hat{c}$ . Therefore, we can apply Lemma 9 and the bound in (7) becomes

$$(c_1^c/\eta_i)^{\mathcal{O}(k)} e^{-\Omega((\eta_i^2/c^2)n_{i-1})} \leq \frac{\delta_0}{2(i+1)^2}.$$

Next, for the case of  $i \geq \pi_1$ , we have  $\rho_i \leq 3/4$  so that

$$\hat{\rho}_i \leq \rho_i / \lceil e^{5/c_0} \rceil^{c_0/4} \leq \rho_i / \lceil e^{5/c_0} \rceil^3,$$

as  $c_0 \geq 12$  by assumption. Since  $\rho_{i+1} \geq \rho_i / \lceil e^{5/c_0} \rceil^2$ , this gives us  $\alpha_i \geq \rho_i (\lceil e^{5/c_0} \rceil^{-2} - \lceil e^{5/c_0} \rceil^{-3})/2$ , which is at least  $12c^2/n_{i-1}$ , as  $\rho_i$ , according to our choice, is about  $c_2(c^3k \log n_{i-1})/(n_{i-1}+1)$  for a large enough constant  $c_2$ . Thus, we can apply Lemma 9 and the bound in (7) becomes

$$(c_1^c/\rho_i)^{\mathcal{O}(k)} e^{-\Omega((\rho_i/c^2)n_{i-1})} \leq \frac{\delta_0}{2(i+1)^2}. \quad (8)$$

This completes the proof of Lemma 5.

### C.1 Proof of Lemma 9

By Lemma 3, the random variables  $\Phi_n^{(\mathbf{v})}$ 's satisfy the same recurrence relation of Balsubramani et al. (2013) for their random variables  $\Phi_n$ 's. Thus, we can follow their analysis<sup>1</sup>, but use our better bound on  $|Z_n|$ , and have the following.

First, when given  $\Gamma_i$ , we have  $|Z_n| \leq 2\gamma_n \sqrt{\rho_i}$  for  $n_{i-1} \leq n < n_i$ . Then one can easily modify the analysis in Balsubramani et al. (2013) to show that for any  $t \geq 0$ ,

$$\mathbb{E} \left[ e^{t\Phi_n^{(\mathbf{v})}} \mid \Gamma_i \right] \leq \exp \left( t\hat{\rho}_i + c^2(6t + 2t^2\rho_i) \left( \frac{1}{n_{i-1}} - \frac{1}{n_i} \right) \right),$$

As a result, we have

by noting that  $(n_i + 1)/(n_{i-1} + 1) = \lceil e^{5/c_0} \rceil$  and  $n \geq n_0 = \hat{c}^c k^3 d^2 \log d$  according to our choice of parameters.

<sup>1</sup>In particular, their proofs for Lemma 2.9 and Lemma 2.10.

Next, following Balsubramani et al. (2013) and applying Doob's martingale inequality, we obtain

$$\begin{aligned} & \Pr \left[ \sup_{n \geq n_i} \Phi_n^{(\mathbf{v})} \geq \hat{\rho}_i + \alpha_i \mid \Gamma_i \right] \\ & \leq \mathbb{E} \left[ e^{t\Phi_n^{(\mathbf{v})}} \mid \Gamma_i \right] \exp \left( -t(\hat{\rho}_i + \alpha_i) + \frac{c^2}{n_i} (6t + 2t^2\rho_i) \right) \\ & \leq \exp \left( -t\alpha_i + \frac{c^2}{n_{i-1}} (6t + 2t^2\rho_i) \right) \\ & \leq \exp \left( -\frac{t\alpha_i}{2} + \frac{2c^2t^2\rho_i}{n_{i-1}} \right), \end{aligned}$$

as  $\alpha_i \geq \frac{12c^2}{n_{i-1}}$ . Finally, by choosing  $t = \frac{\alpha_i n_{i-1}}{8c^2\rho_i}$ , we have the lemma.

### C.2 Proof of Lemma 10

Assume without loss of generality that  $\Phi_n^{(\mathbf{v})} \leq \Phi_n^{(\mathbf{u})}$  (otherwise, we switch  $\mathbf{v}$  and  $\mathbf{u}$ ), so that

$$\left| \Phi_n^{(\mathbf{v})} - \Phi_n^{(\mathbf{u})} \right| = \frac{\|U^\top Y_n \mathbf{v}\|^2}{\|Y_n \mathbf{v}\|^2} - \frac{\|U^\top Y_n \mathbf{u}\|^2}{\|Y_n \mathbf{u}\|^2}.$$

As  $\|\mathbf{v} - \mathbf{u}\| \leq \epsilon$ , we have

$$\frac{\|U^\top Y_n \mathbf{v}\|}{\|Y_n \mathbf{v}\|} \leq \frac{\|U^\top Y_n \mathbf{u}\| + \epsilon \|U^\top Y_n\|}{\|Y_n \mathbf{u}\| - \epsilon \|Y_n\|}. \quad (9)$$

To relate this to  $\frac{\|U^\top Y_n \mathbf{u}\|^2}{\|Y_n \mathbf{u}\|^2}$ , we would like to express  $\|U^\top Y_n\|$  in terms of  $\|U^\top Y_n \mathbf{u}\|$  and  $\|Y_n\|$  in terms of  $\|Y_n \mathbf{u}\|$ . For this, note that both  $\|U^\top Y_n \mathbf{u}\|/\|U^\top Y_n\|$  and  $\|Y_n \mathbf{u}\|/\|Y_n\|$  are at least  $\|U^\top Y_n \mathbf{u}\|/\|Y_n\|$ , which by Proposition 1 is at least

$$\left( \frac{n_{i-1}}{n} \right)^{3c} \frac{\|U^\top Y_{n_{i-1}} \mathbf{u}\|}{\|Y_{n_{i-1}}\|} \geq c_1^{-6c} \frac{\|U^\top Y_{n_{i-1}} \mathbf{u}\|}{\|Y_{n_{i-1}}\|}, \quad (10)$$

using the fact that  $n_{i-1}/n \geq n_{i-1}/n_{i+1} \geq 1/c_1^2$ . Then as  $Y_{n_{i-1}} = Q_{n_{i-1}}$  and  $\|Q_{n_{i-1}}\| = \|Q_{n_{i-1}} \mathbf{u}\|$ , the righthand side of (10) becomes

$$c_1^{-6c} \frac{\|U^\top Q_{n_{i-1}} \mathbf{u}\|}{\|Q_{n_{i-1}} \mathbf{u}\|} = c_1^{-6c} \sqrt{1 - \Phi_{n_{i-1}}^{(\mathbf{u})}} \geq c_1^{-6c} \sqrt{1 - \rho_i},$$

given  $\Gamma_i$ . What we have obtained so far is a lower bound for both  $\|U^\top Y_n \mathbf{u}\|/\|U^\top Y_n\|$  and  $\|Y_n \mathbf{u}\|/\|Y_n\|$ . Plugging this into (9), with  $\hat{\epsilon} = \epsilon c_1^{6c}/\sqrt{1 - \rho_i}$ , we get

$$\frac{\|U^\top Y_n \mathbf{v}\|}{\|Y_n \mathbf{v}\|} \leq \frac{\|U^\top Y_n \mathbf{u}\|(1 + \hat{\epsilon})}{\|Y_n \mathbf{u}\|(1 - \hat{\epsilon})}.$$

$$\left| \Phi_n^{(\mathbf{v})} - \Phi_n^{(\mathbf{u})} \right| \leq \frac{\|U^\top Y_n \mathbf{u}\|^2}{\|Y_n \mathbf{u}\|^2} \left( \frac{(1 + \hat{\epsilon})^2}{(1 - \hat{\epsilon})^2} - 1 \right) \leq 16\hat{\epsilon},$$

since  $\frac{(1+\hat{\epsilon})^2}{(1-\hat{\epsilon})^2} - 1 \leq \frac{4\hat{\epsilon}}{(1-\hat{\epsilon})^2} \leq 16\hat{\epsilon}$  for  $\hat{\epsilon} \leq 1/2$ .

## D Proof of Lemma 7

As  $\cos(U, Q_{i-1})^2 = \frac{1}{1+\tan(U, Q_{i-1})^2} \geq \frac{1}{1+\varepsilon_{i-1}^2} \geq \beta_i^2$ , we have  $\|G_i\| \leq \Delta\beta_i \leq \Delta \cos(U, Q_{i-1})$ . Thus, we can apply Lemma 6 and have

$$\tan(U, AQ_{i-1} + G_i) \leq \max(\beta_i, \max(\beta_i, \gamma)\varepsilon_{i-1}),$$

which is at most  $\max(\beta_i, \gamma\varepsilon_{i-1}) \leq \gamma\varepsilon_{i-1} = \varepsilon_i$ . The lemma follows as  $\tan(U, Q_i) = \tan(U, AQ_{i-1} + G_i)$ .

## E Proof of Lemma 8

Let  $\rho = \Delta\beta_i$  and note that  $\|G_i\| \leq \|A - F_i\|$ , where  $F_i$  is the average of  $|I_i|$  i.i.d. random matrices, each with mean  $A$ . Recall that  $\|A\| \leq 1$  by Assumption 1. Then from a matrix Chernoff bound, we have

$\Pr[\|G_i\| > \rho] \leq \Pr[\|A - F_i\| > \rho] \leq de^{-\Omega(\rho^2|I_i|)} \leq \delta_i$ , for  $|I_i|$  given in (3).

## F Proof of Lemma 9

Let  $L$  be the iteration number such that  $\varepsilon_{L-1} > \varepsilon$  and  $\varepsilon_L \leq \varepsilon$ . Note that with  $\varepsilon_L = \varepsilon_0\gamma^L = \varepsilon_0(1 - (\lambda - \bar{\lambda})/\lambda)^{L/4} \leq \varepsilon_0e^{-L(\lambda - \bar{\lambda})/(4\lambda)}$ , we can have

$$L \leq \mathcal{O}\left(\frac{\lambda}{\lambda - \bar{\lambda}} \log \frac{\varepsilon_0}{\varepsilon}\right) \leq \mathcal{O}\left(\frac{\lambda}{\lambda - \bar{\lambda}} \log \frac{d}{\varepsilon}\right).$$

As the number of samples in iteration  $i$  is

$$|I_i| = \mathcal{O}\left(\frac{\log(d/\delta_i)}{(\lambda - \bar{\lambda})^2\beta_i^2}\right) \leq \mathcal{O}\left(\frac{\log(di)}{(\lambda - \bar{\lambda})^2\beta_i^2}\right),$$

the total number of samples needed is

$$\sum_{i=1}^L |I_i| \leq \mathcal{O}\left(\frac{\log(dL)}{(\lambda - \bar{\lambda})^2}\right) \cdot \sum_{i=1}^L \frac{1}{\beta_i^2}.$$

With  $\beta_i = \min(\gamma/\sqrt{1 + \varepsilon_{i-1}^2}, \gamma\varepsilon_{i-1})$ , one sees that for some  $i_0 \leq \mathcal{O}(\log d)$ ,  $\beta_i = \gamma/\sqrt{1 + \varepsilon_{i-1}^2}$  when  $i \leq i_0$  and  $\beta_i = \gamma\varepsilon_{i-1} = \varepsilon_i$  when  $i > i_0$ . This implies that

$$\sum_{i=1}^L \frac{1}{\beta_i^2} = \sum_{i=1}^{i_0} \frac{1 + \varepsilon_{i-1}^2}{\gamma^2} + \sum_{i=i_0+1}^L \frac{1}{\varepsilon_i^2}, \quad (11)$$

where the first sum in the righthand side of (11) is

$$\frac{i_0}{\gamma^2} + \sum_{i=1}^{i_0} \varepsilon_0^2 \gamma^{2i-4} \leq \frac{\mathcal{O}(\log d)}{\gamma^2} + \frac{\varepsilon_0^2}{\gamma^2(1 - \gamma^2)},$$

while the second sum is

$$\sum_{i=i_0+1}^L \frac{\gamma^{2(L-i)}}{\varepsilon_L^2} \leq \frac{1}{(1 - \gamma^2)\varepsilon_L^2} \leq \frac{1}{\gamma^2(1 - \gamma^2)\varepsilon^2}$$

using the fact that  $\varepsilon_L = \gamma\varepsilon_{L-1} \geq \gamma\varepsilon$ . Since  $\gamma^2 = \left(1 - \frac{\lambda - \bar{\lambda}}{\lambda}\right)^{1/2} \leq 1 - \frac{\lambda - \bar{\lambda}}{2\lambda}$ , we have  $\frac{1}{1 - \gamma^2} \leq \frac{2\lambda}{\lambda - \bar{\lambda}}$ , and since  $\lambda \leq \mathcal{O}(\bar{\lambda})$ , we also have  $\frac{1}{\gamma^2} \leq \mathcal{O}(1)$ . Moreover, as we assume that  $\varepsilon \leq 1/\sqrt{k\bar{d}}$ , we can conclude that the total number of samples needed is at most

$$\sum_{i=1}^L |I_i| \leq \mathcal{O}\left(\frac{\log(dL)}{(\lambda - \bar{\lambda})^2}\right) \cdot \mathcal{O}\left(\frac{\lambda}{(\lambda - \bar{\lambda})\varepsilon^2}\right) \leq \mathcal{O}\left(\frac{\lambda \log(dL)}{\varepsilon^2(\lambda - \bar{\lambda})^3}\right).$$

## References

- Balsubramani, A., Dasgupta, S., and Freund, Y. (2013). The fast convergence of incremental pca. In *Advances in Neural Information Processing Systems*.
- Milman, V. D. and Schechtman, G. (1986). *Asymptotic theory of finite-dimensional normed spaces*. Lecture Notes in Mathematics. Springer.
